# Supplementary material for: Genetic structure and relationships within and between cultivated and wild korarima [Aframomum corrorima (Braun) P.C.M. Jansen] in Ethiopia as revealed by simple sequence repeat (SSR) markers
Source: PubMed Central journal article supplement (PMC5540420; doi:10.1186/s12863-017-0540-4), 2017-08-01

$$\text{DeltaK} = \text{mean}(|L''(K)|) / \text{sd}(L(K))$$

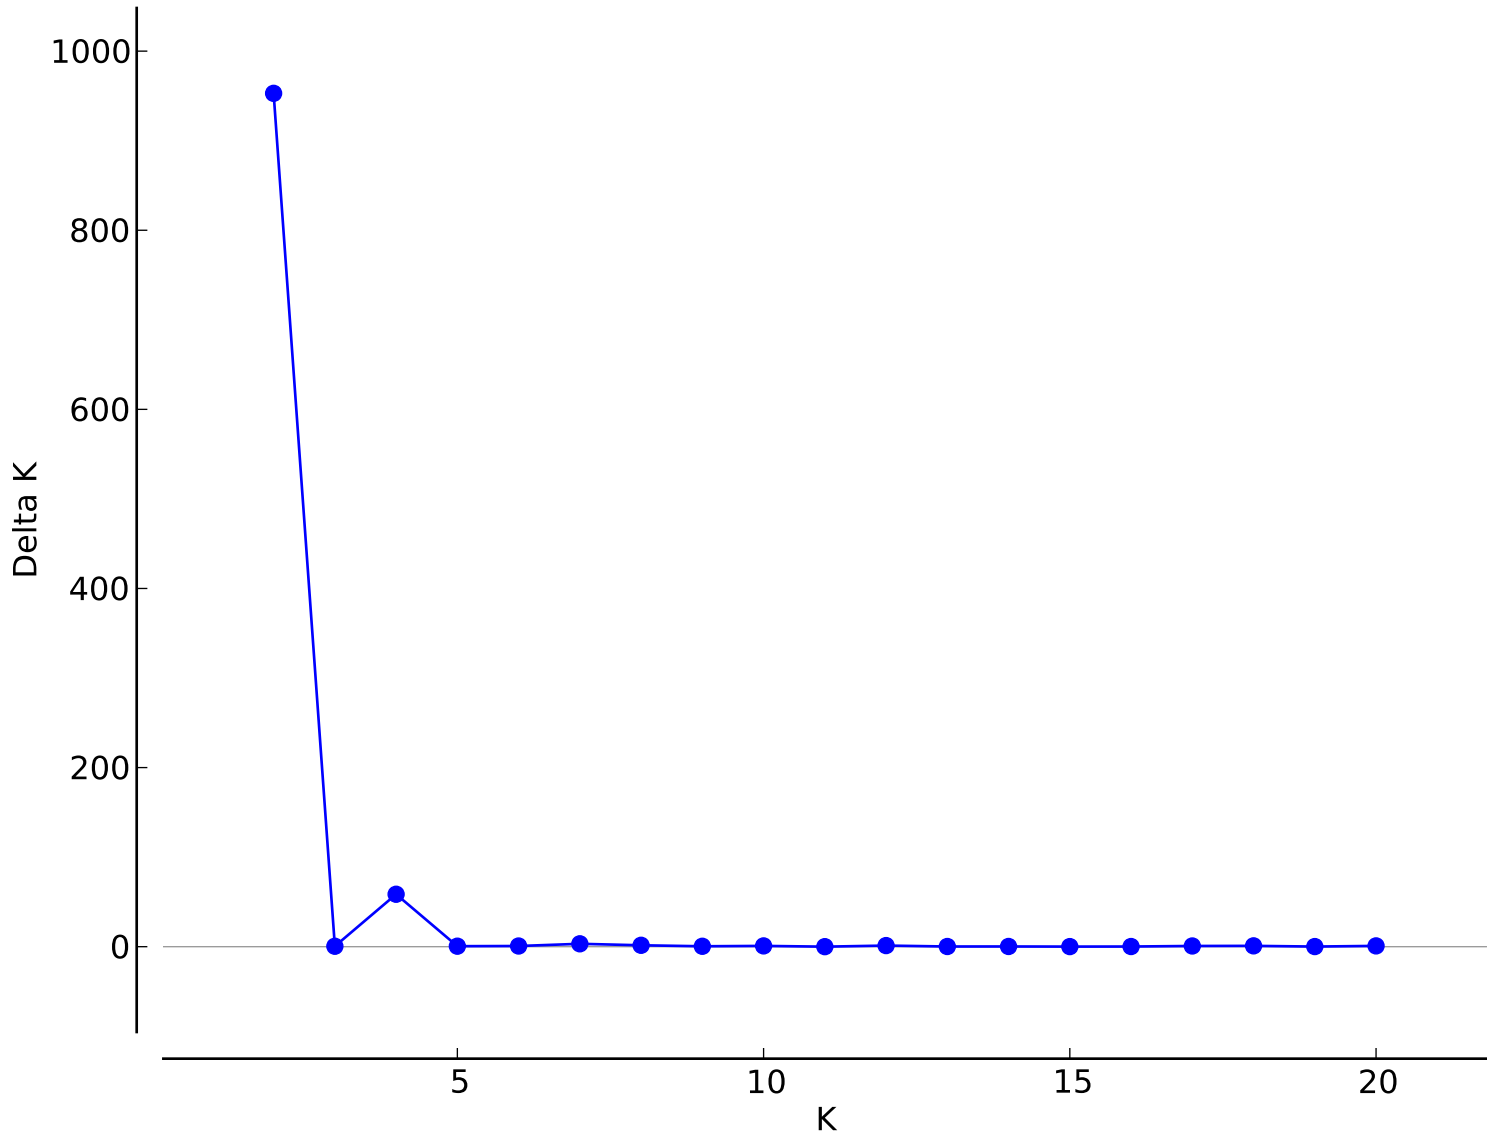

Supplement: 12863_2017_540_MOESM3_ESM.pdf [file 12863_2017_540_MOESM3_ESM.pdf]
